# Supplementary material for: Establishing F1A-CreERT2 Mice to Trace Fgf1 Expression in Adult Mouse Cardiomyocytes
Source: MDPI journal article supplement (doi:10.3390/cells11010121), 2021-12-30

**Supplementary Table S1. Primers for PCR and Table2. Primer for qPCR**

| Amplicon            | Expected size | Primer pair | Primer name | Sequences 5'→3'        |
|---------------------|---------------|-------------|-------------|------------------------|
| F1A/RFP             | 537 bp        | Forward     | F1A(m)-F    | gccacctgttaagtggccag   |
|                     |               | Reverse     | Rfp-R       | cgtcagcggggtacagcatc   |
| Cre                 | 562 bp        | Forward     | CreF        | ctaaactagcttcacgtcggtc |
|                     |               | Reverse     | CreR        | tctgaccagagtcaccttagcg |
| LacZ                | 336 bp        | Forward     | LacZF       | actggccgtcggtttacaacg  |
|                     |               | Reverse     | LacZR       | ttctccgtgggaacaaacgg   |
| R26R_<br>wild type  | 603 bp        | Forward     | R26F2       | aaagtcgctctgaggttggtat |
|                     |               | Reverse     | R523        | ggagcggagaaatggatatg   |
| R26R_<br>transgene  | 340 bp        | Forward     | R26F2       | aaagtcgctctgaggttggtat |
|                     |               | Reverse     | R1295       | gcgaagagttgtcctcaacc   |
| GAPDH               | 500 bp        | Forward     | Gapdh-F3    | aaatggtgaaggtcggtgtga  |
|                     |               | Reverse     | Gapdh-R3    | tcataacggcggttcattcat  |
| PGK neo 4xpA Floxed | ~800 bp       | Forward     | R26F2       | aaagtcgctctgaggttggtat |
|                     |               | Reverse     | LacZR       | ttctccgtgggaacaaacgg   |

**Supplementary Table S2. PCR results of R26F2/LacZR, R26F2/R1295, R26F2/LacZR, R26F2/R1295, R26F2/LacZR and R26F2/R1295 (internal control)**

| Amplicon  | Expected size | Primer pair | Primer name | Sequences 5'→3'        |
|-----------|---------------|-------------|-------------|------------------------|
| F1A/exon1 | 499 bp        | Forward     | F1A-Fw      | cccaaagccaagaagccacc   |
|           |               | Reverse     | Exon1-Rv    | tgtgctggtcgctcctgtccct |
| Cre       | 195 bp        | Forward     | Cre-Fw      | gatttcgaccaggttcggtc   |
|           |               | Reverse     | Cre-Rv      | gctaaccagcggtttcggtc   |
| RFP       | 333 bp        | Forward     | RFP-Fw      | tgagaatcaaggtggtcgag   |
|           |               | Reverse     | RFP-Rv      | cgtcagcggggtacagcatc   |
| β-actin   | 233 bp        | Forward     | β-actin-Fw  | ctaggcaccaggggtgtgatg  |
|           |               | Reverse     | β-actin-Rv  | gttggccttaggggtcaggg   |

PCR conditions

[Kapa LongRange Hotstart Reagent ReadyMix \(kk3601\)](#)

Amplicon: F1A/Cre (2217 bp) :

PCR program: 1 cycle of 95 °C for 5 min, 35 cycles of 95 °C for 15 sec, 55 °C for 15

sec, 68 °C for 10 min and final 68°C for 10 min °

[Kapa Taq ReadyMix with dye \(kk1024\)](#)

Amplicon: F1A/RFP 、 Cre 、 LacZ 、 RFP : PCR program: 1 cycle of 95 °C for 5 min, 35 cycles of 95 °C for 30sec, 56 °C for 40 sec, 72 °C for 1 min and final 72 °C for 7 min.

Amplicon: actin 、 GAPDH: 1 cycle of 95 °C for 5 min, 20 cycles of 95 °C for 20sec, 55 °C for 30 sec, 72 °C for 50 sec and final 72 °C for 7 min.

qPCR : [KAPA SYBR® FAST qPCR Master Mix \(2X\) Kit](#)

Gene expression detection and data analysis were performed using ABI7500 1.41 version software (ABI). The program is 1cycle of 50 °C for 2min, 1 cycle of 95 °C for 10min, 40 cycles of 95 °C for 15 sec, 60°C for 1min and 1cycle of 95 °C for 15sec 60 °C for 1min 95 °C for 15 sec 60 °C for 15 sec.

# Supplementary Figure S1:

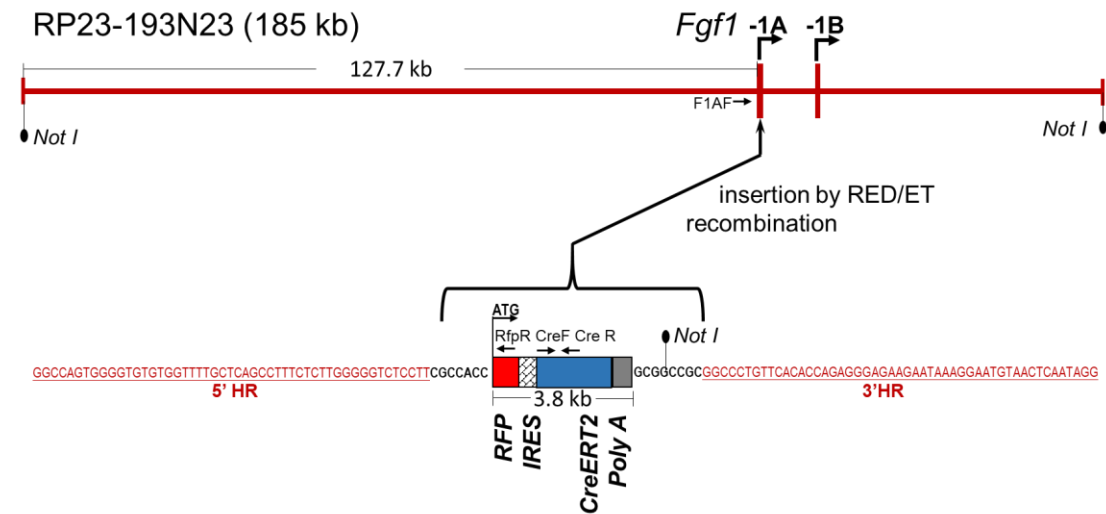

**Supplementary Figure S1:** Construction map of the mouse *Fgf1A-CreERT<sup>T2</sup>* transgene. The transgene was constructed using mouse BAC clone RP23-193N23 including *Fgf1A* 5'UTR (127.7 kb), exon 1A, and 1B sequence as the transgene backbone. The bicistronic expression cassette RFP-IRES-CreER<sup>T2</sup>-polyA containing an upstream Kozak sequence and a downstream *Not I* site was inserted into the exon 1A by RED/ET recombination system. The modified BAC was purified, *Not I* digest, and pulsed-field gel electrophoresis to isolate the transgene including the *Fgf1A* 5'UTR and expression cassette for mouse pronuclear microinjection. The junction sequences flanking the insertion site were also shown. Primers designed for genotyping: F1AF, RfpR, CreF and CreR.

**Supplementary Figure S2. PCR results of R26F2/LacZR, R26F2/R1295, R26F2/LacZR, R26F2/R1295, R26F2/LacZR and R26F2/R1295 (internal control)**

Primer pairs: R26F2/LacZR

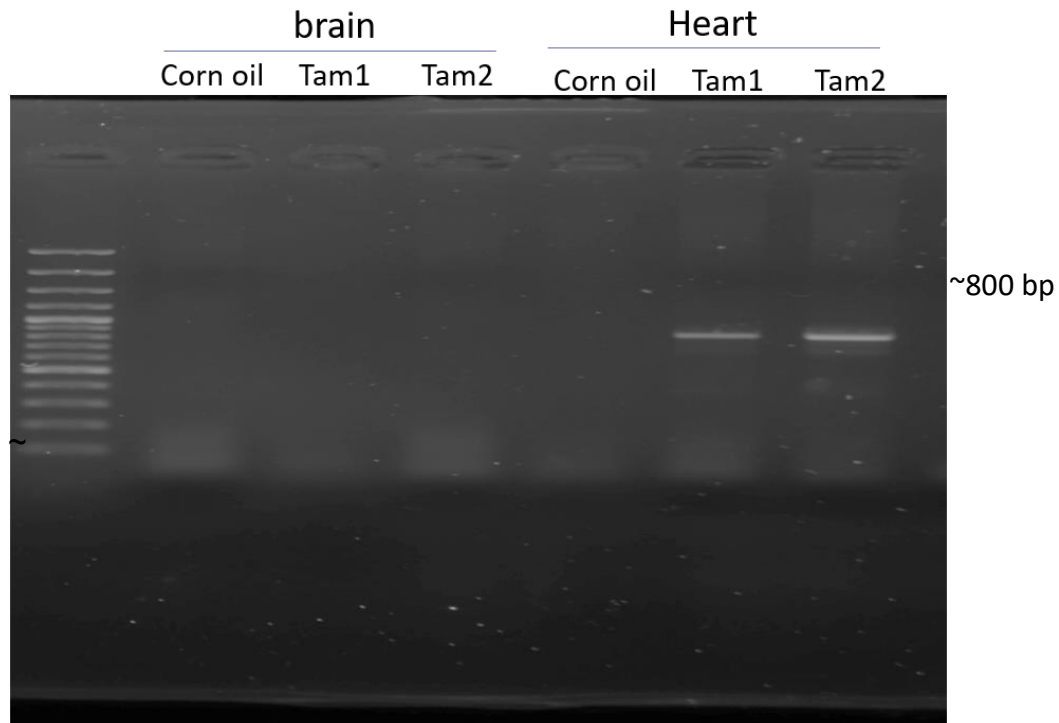

Primer pairs: R26F2/R1295 (internal control)

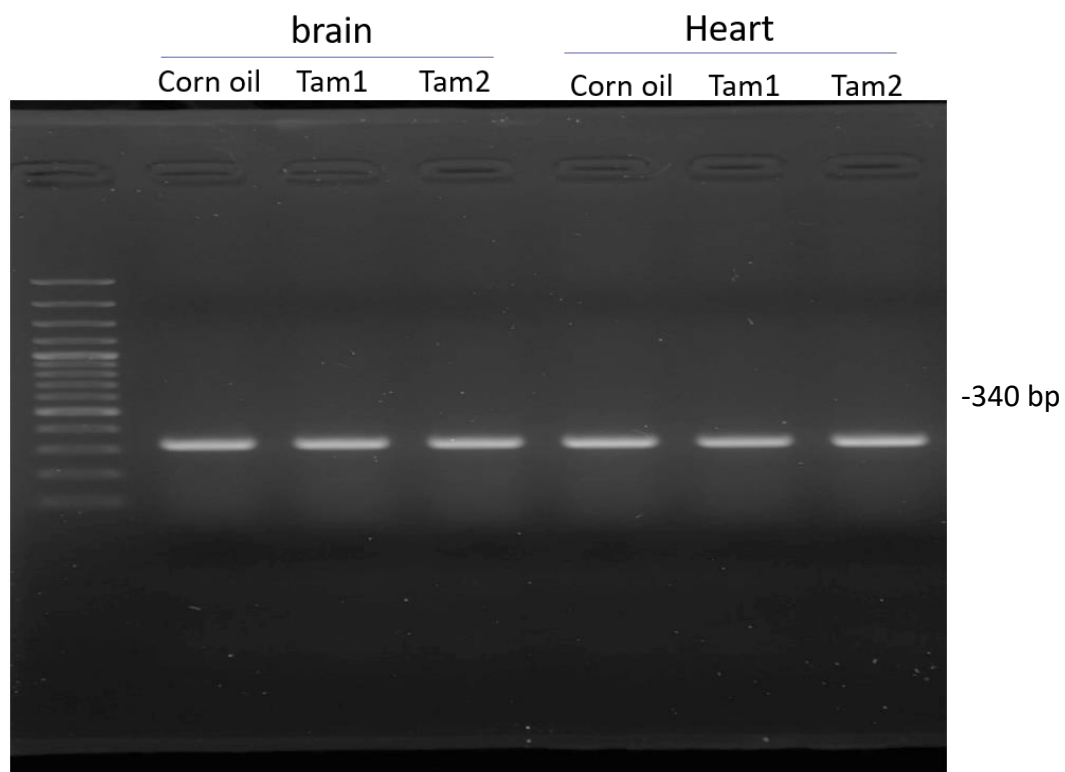

Primer pairs: R26F2/LacZR

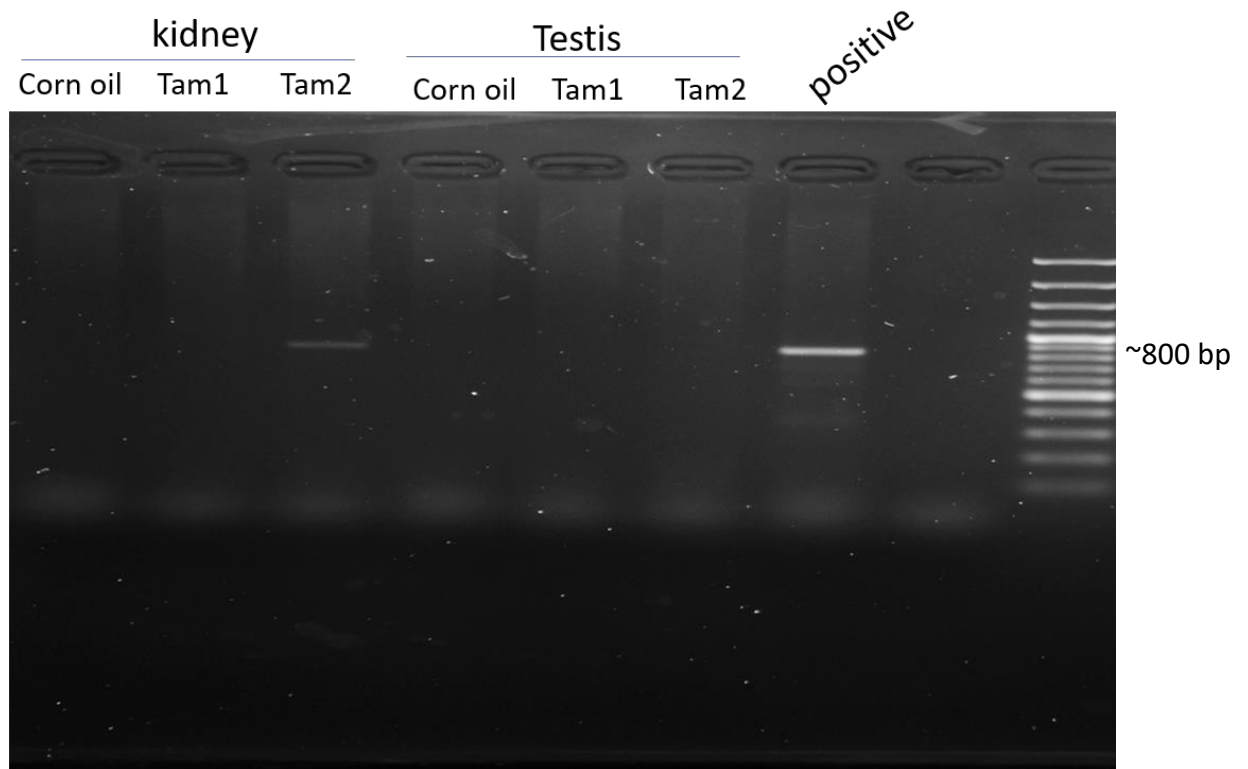

Primer pairs: R26F2/R1295 (internal control)

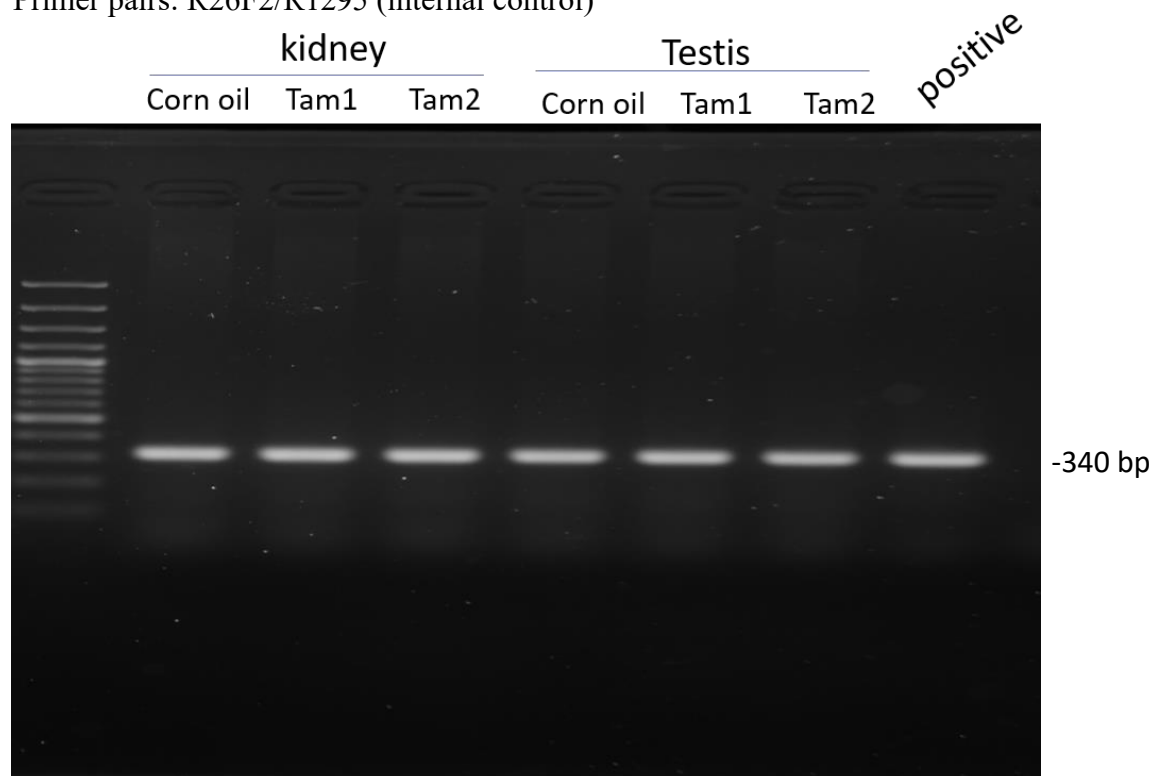

Primer pairs: R26F2/LacZR

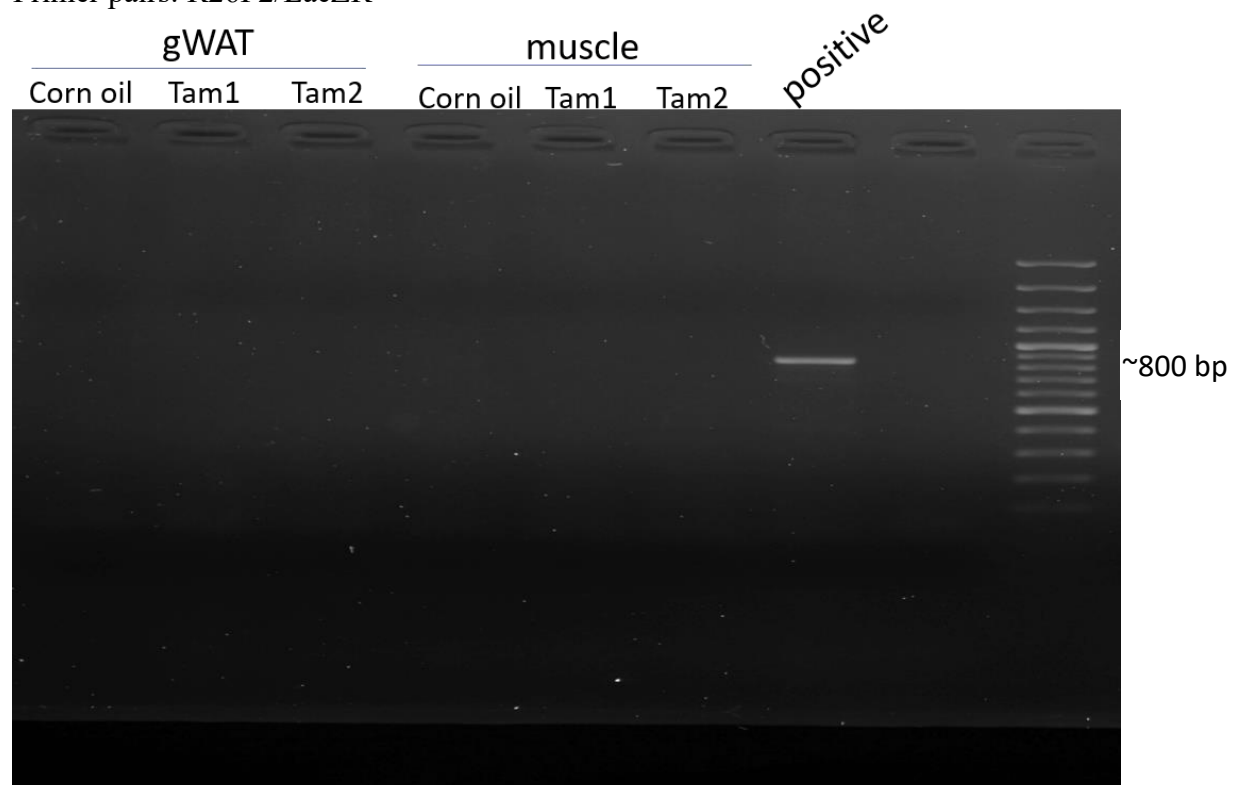

Primer pairs: R26F2/R1295 (internal control)

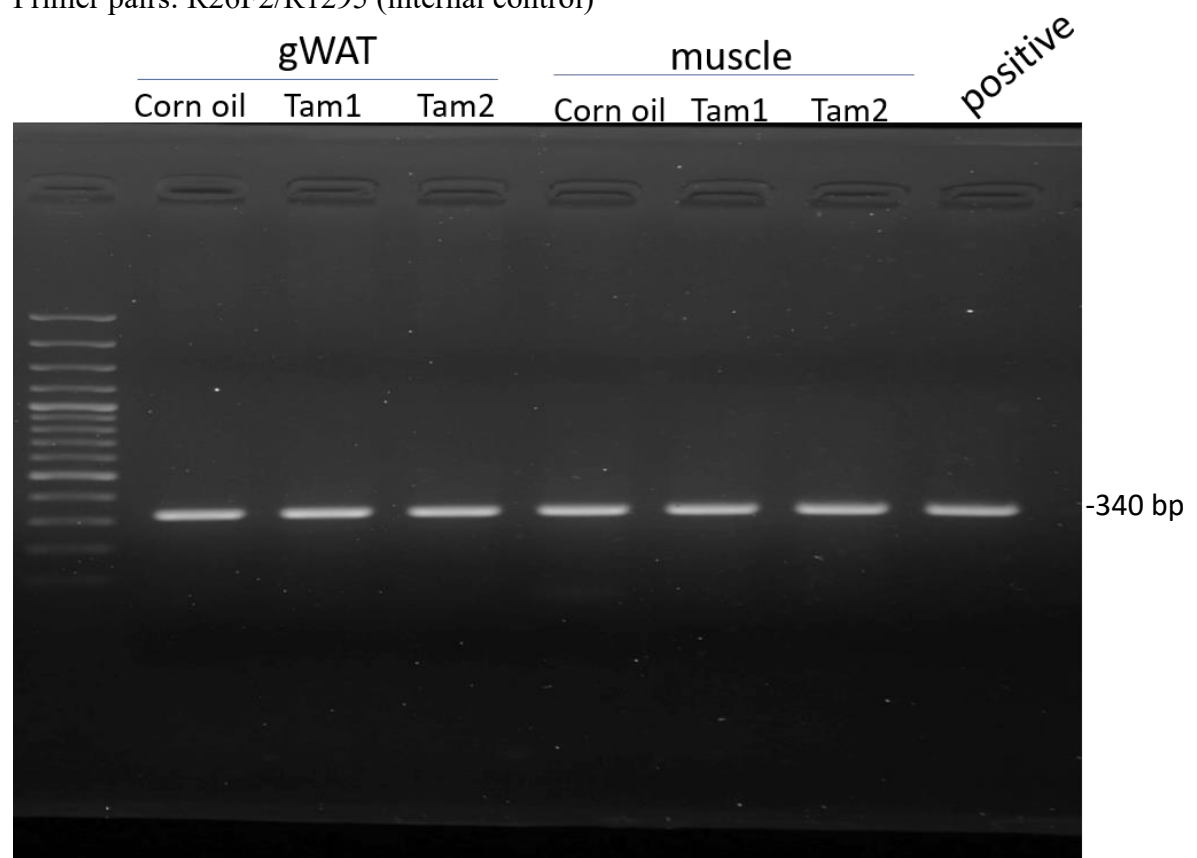

**Supplement Figure S3. Immunohistochemical staining in the heart of E18 embryo**  
A.

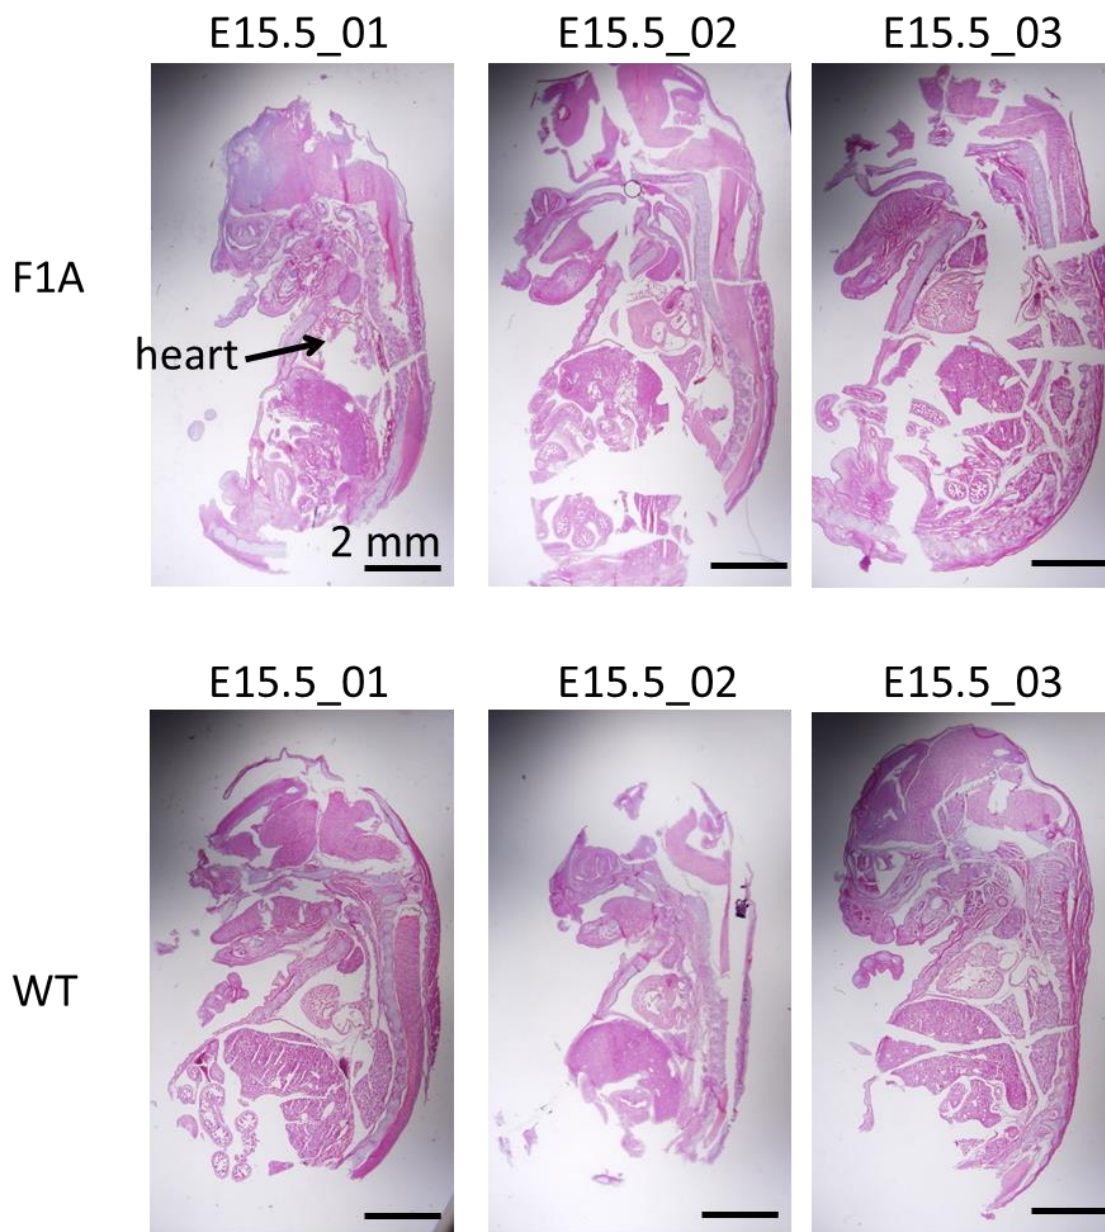



B.

F1A

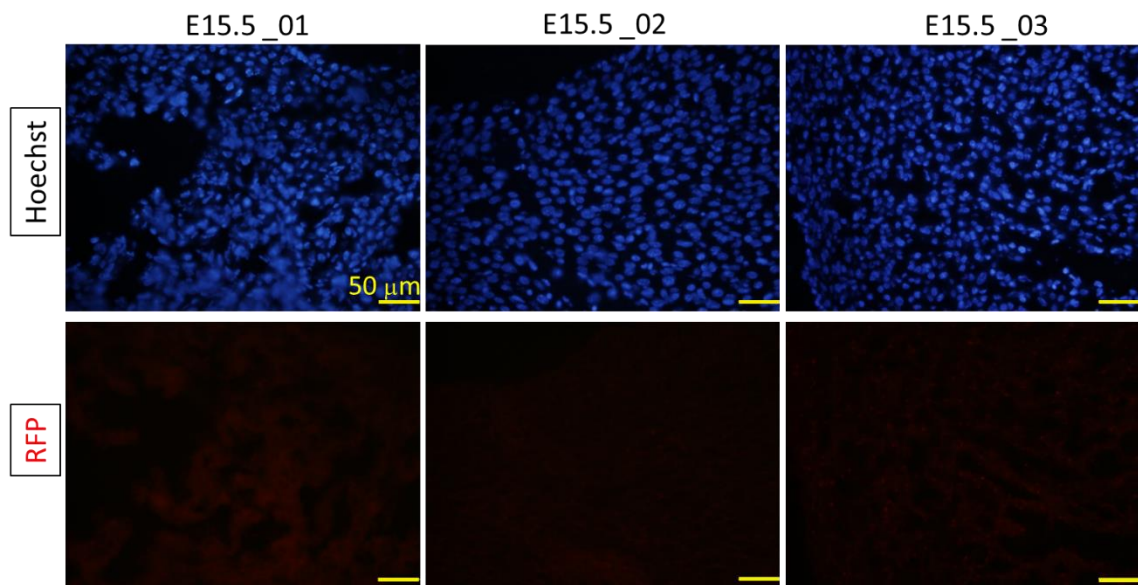

C.

WT

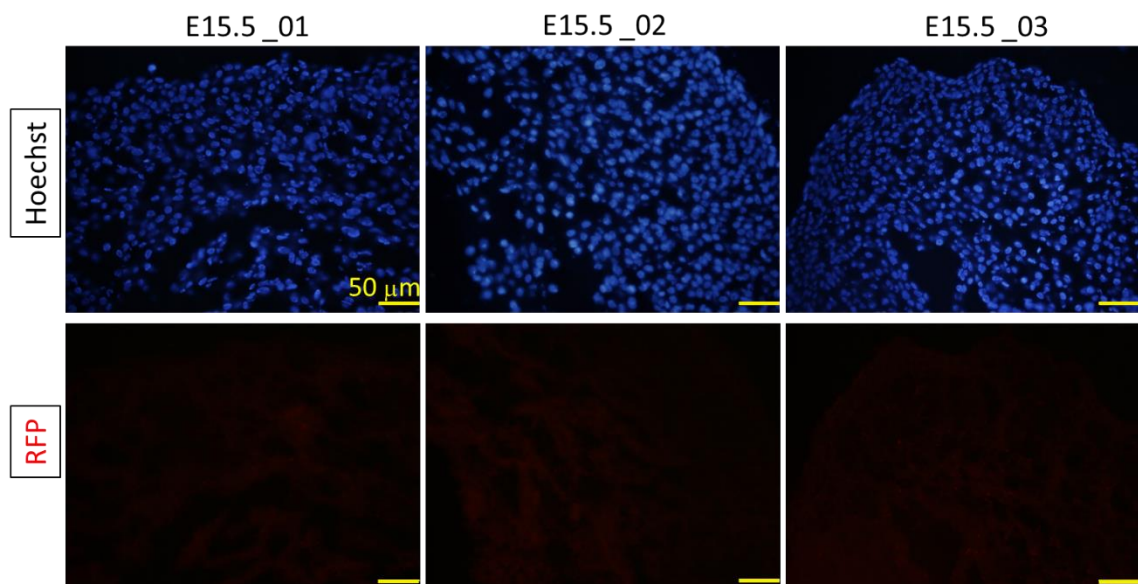

Supplement: s1 [file s1]
